# Supplementary material for: Graphene-Based Ion-Selective Field-Effect Transistor for Sodium Sensing
Source: MDPI journal article supplement (doi:10.3390/nano12152620), 2022-07-29
Supplement: s1 [file s1]

# Graphene-Based Ion-Selective Field-Effect Transistor for Sodium Sensing

Ting Huang <sup>1</sup>, Kan Kan Yeung <sup>1,2</sup>, Jingwei Li <sup>1,3</sup>, Honglin Sun <sup>1</sup>, Md Masruck Alam <sup>1</sup> and Zhaoli Gao <sup>1,2,\*</sup>

<sup>1</sup> Biomedical Engineering Department, The Chinese University of Hong Kong, Shatin, New Territories, Hong Kong, China; irishhh@link.cuhk.edu.hk (T.H.); kyeung@cuhk.edu.hk (K.K.Y.); jlidt@connect.ust.hk (J.L.); sunhl20@link.cuhk.edu.hk (H.S.); masruckalam@link.cuhk.edu.hk (M.M.A.)

<sup>2</sup> CUHK Shenzhen Research Institute, Nanshan, Shenzhen 518057, China

<sup>3</sup> Department of Chemical and Biological Engineering, The Hong Kong University of Science and Technology, Clear Water Bay, Kowloon, Hong Kong, China.

\* Correspondence: zlgao@cuhk.edu.hk

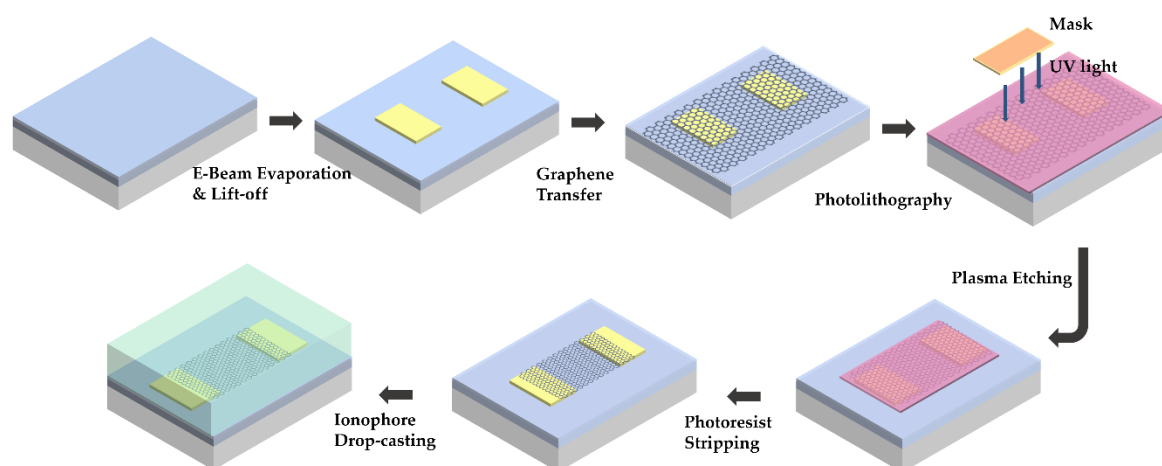

**Figure S1.** Schematic of the scalable fabrication process of the G-ISFETs. Graphene was grown via atmosphere pressure CVD on a Cu foil and wet-transferred to the pre-patterned SiO<sub>2</sub>/Si wafer using a PMMA-assisted bubbling transfer method. The graphene channel was defined by a photolithography process and etched through a plasma etcher, followed by stripping of the remaining photoresist. The prepared sodium Ionophore was applied by drop-casting.

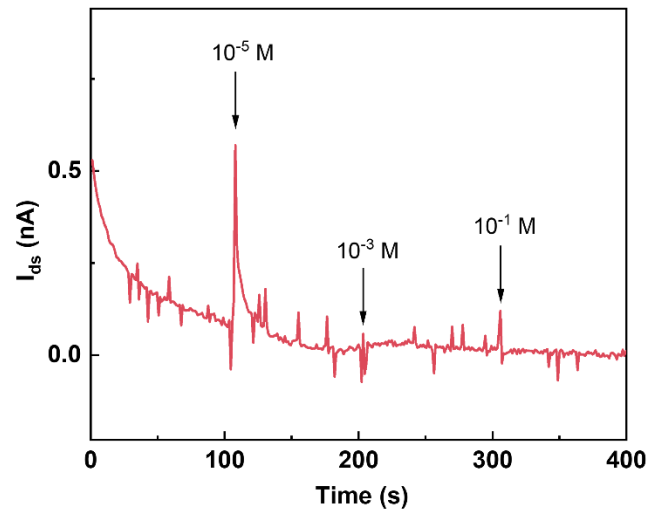

**Figure S2.** Real-time measurement of drain-source current with a bare ISM, against varying sodium concentrations ( $10^{-5}$  M,  $10^{-3}$  M, and  $10^{-1}$  M). The drain-source current is at the nA level, three orders of magnitude lower than the G-ISFET. This result indicates that the leaking current through the sodium solutions was negligible in our study.

**Table S1.** Comparison of ion sensitivities for sodium sensing.

| Type   | Sensing channel                            | Detection Range       | Sensitivity      | Ref       |
|--------|--------------------------------------------|-----------------------|------------------|-----------|
| ISFET  | silicon nanowire (SiNW)                    | $10^{-4} - 10^0$ M    | 1464.66 mV/dec   | [1]       |
| ISFET  | Carbon Nanotube (CNT)                      | $10^{-4} - 10^{-1}$ M | 71.7 mV/dec      | [2]       |
| OFET   | Poly(3-hexylthiophene)                     | $10^{-6} - 10^{-1}$ M | 62 mV/dec        | [3]       |
| FinFET | Al <sub>2</sub> O <sub>3</sub> Nanoseaweed | NA                    | 432.7 mV/ dec    | [4]       |
| ISFET  | Graphene                                   | $10^{-4} - 10^0$ M    | 55.4 mV/dec      | [5]       |
| ISFET  | Graphene                                   | $10^{-5} - 10^{-1}$ M | 49.2 mV/ dec     | [6]       |
| ISFET  | Graphene, Graphene/ hBN                    | $10^{-4} - 10^0$ M    | 135, 160 mV/ dec | [7]       |
| ISFET  | Graphene                                   | $10^{-8} - 10^{-1}$ M | 152.4 mV/ dec    | This work |

## Reference

1. Cho, S.K. and W.J. Cho, *Highly Sensitive and Selective Sodium Ion Sensor Based on Silicon Nanowire Dual Gate Field-Effect Transistor*. *Sensors*, 2021. **21**(12).
2. Park, S.-C., et al., *Carbon Nanotube-Based Ion-Sensitive Field-Effect Transistors with an On-Chip Reference Electrode Toward Wearable Sodium Sensing*. *ACS Applied Electronic Materials*, 2021. **3**(6): p. 2580-2588.
3. Schmoltner, K., et al., *Electrolyte-Gated Organic Field-Effect Transistor for Selective Reversible Ion Detection*. *Advanced Materials*, 2013. **25**(47): p. 6895-6899.
4. Shen, Y.C., et al., *Multifunctional Ion-Sensitive Floating Gate Fin Field-Effect Transistor with Three-Dimensional Nanoseaweed Structure by Glancing Angle Deposition Technology*. *Small*, 2022. **18**(5).
5. Oh, H.G., et al., *Two-Dimensional Disposable Graphene Sensor to Detect Na<sup>+</sup> Ions*. *Nanomaterials*, 2021. **11**(3).
6. Fakih, I., et al., *Selective ion sensing with high resolution large area graphene field effect transistor arrays*. *Nat Commun*, 2020. **11**(1): p. 3226.
7. Hasan, N., et al., *Ion-Selective Membrane-Coated Graphene–Hexagonal Boron Nitride Heterostructures for Field-Effect Ion Sensing*. *ACS omega*, 2021. **6**(45): p. 30281-30291.
